# Supplementary material for: “Pochva”: a new hydro-thermal process model in soil, snow, vegetation for application in atmosphere numerical models
Source: Copernicus journal article supplement (doi:10.5194/gmd-2024-138), 2024-08-05
Supplement: Supplementary file [file gmd-2024-138-AC2-supplement.pdf]

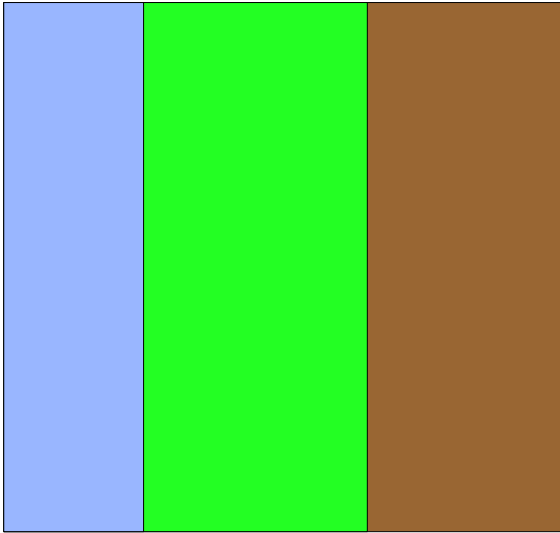

V

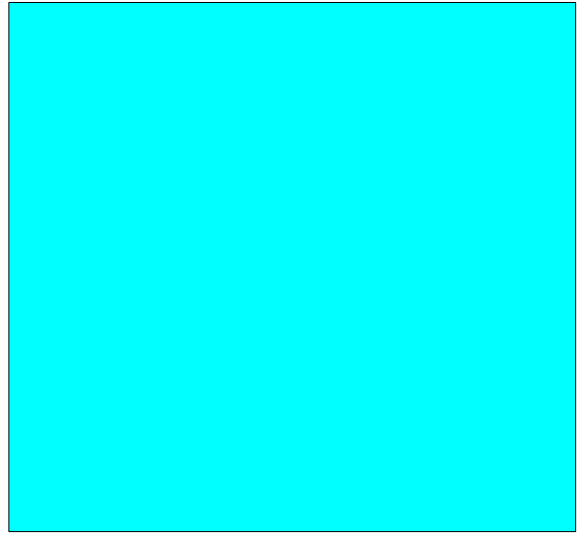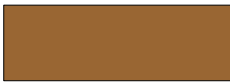

Bare soil

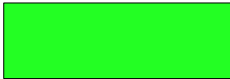

Low vegetation

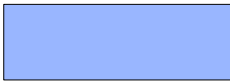

Liquid water on the plant leaf surface

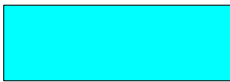

Snow cover
